# Supplementary material for: Radiotherapy in Combination with Systemic Therapy for Multiple Myeloma—A Critical Toxicity Evaluation in the Modern Treatment Era
Source: MDPI journal article supplement (doi:10.3390/cancers15112909), 2023-05-25
Supplement: s1 [file s1]

**Table S1.** Hematological toxicities given in absolute numbers and percentages (in parentheses). Grading based on the National Cancer Institute's Common Terminology Criteria for Adverse Events version 5.0 (CTCAE) [21]. Information on hematological toxicities were available for a variable number of patients depending on accessibility of laboratory values. Percentage values are adjusted relative to the basic population.

| Hematological Toxicity and Grade           | Total     | RT        | RT/ST     | p     |
|--------------------------------------------|-----------|-----------|-----------|-------|
| Any hematological toxicity: Entire period* |           |           |           |       |
| Low-Grade                                  | 73 (89)   | 23 (79.3) | 50 (94.3) | 0.349 |
| Not recorded                               | 9 (11)    | 6 (20.7)  | 3 (5.7)   |       |
| High-Grade                                 | 37 (45.1) | 8 (27.6)  | 29 (54.7) |       |
| Not recorded                               | 25 (30.5) | 14 (48.3) | 11 (20.8) |       |
| Any hematological toxicity: Before RT*     |           |           |           |       |
| Low-Grade                                  | 46 (56.1) | 14 (48.3) | 32 (60.4) | 1.000 |
| Not recorded                               | 20 (24.4) | 10 (34.5) | 10 (18.9) | 1.000 |
| High-Grade                                 | 7 (8.5)   | 2 (6.9)   | 5 (9.4)   |       |
| Not recorded                               | 20 (24.4) | 10 (34.5) | 10 (18.9) |       |
| Any hematological toxicity: During RT *    |           |           |           |       |
| Low-Grade                                  | 59 (72.0) | 18 (62.1) | 41 (77.4) | 1.000 |
| Not recorded                               | 19 (23.2) | 10 (34.5) | 9 (17.0)  | 0.754 |
| High-Grade                                 | 16 (19.5) | 4 (13.8)  | 12 (22.6) |       |
| Not recorded                               | 22 (26.8) | 10 (34.5) | 12 (22.6) |       |
| Any hematological toxicity: After RT *     |           |           |           |       |
| Low-Grade                                  | 61 (74.4) | 18 (62.1) | 43 (81.1) | 0.668 |
| Not recorded                               | 14 (17.1) | 8 (27.6)  | 6 (11.3)  | 0.018 |
| High-Grade                                 | 31 (37.8) | 5 (17.2)  | 26 (49.1) |       |
| Not recorded                               | 15 (18.3) | 8 (27.6)  | 7 (13.2)  |       |

\* Patients can be listed both in the high- and low-grade group due to the combination of several categories.
